# Supplementary material
Source: PubMed Central journal article supplement (PMC2787126)
Supplement: 0905396106_0905396106SI.pdf [file 0905396106_0905396106SI.pdf]

# Supporting Information

Zhang et al. 10.1073/pnas.0905396106

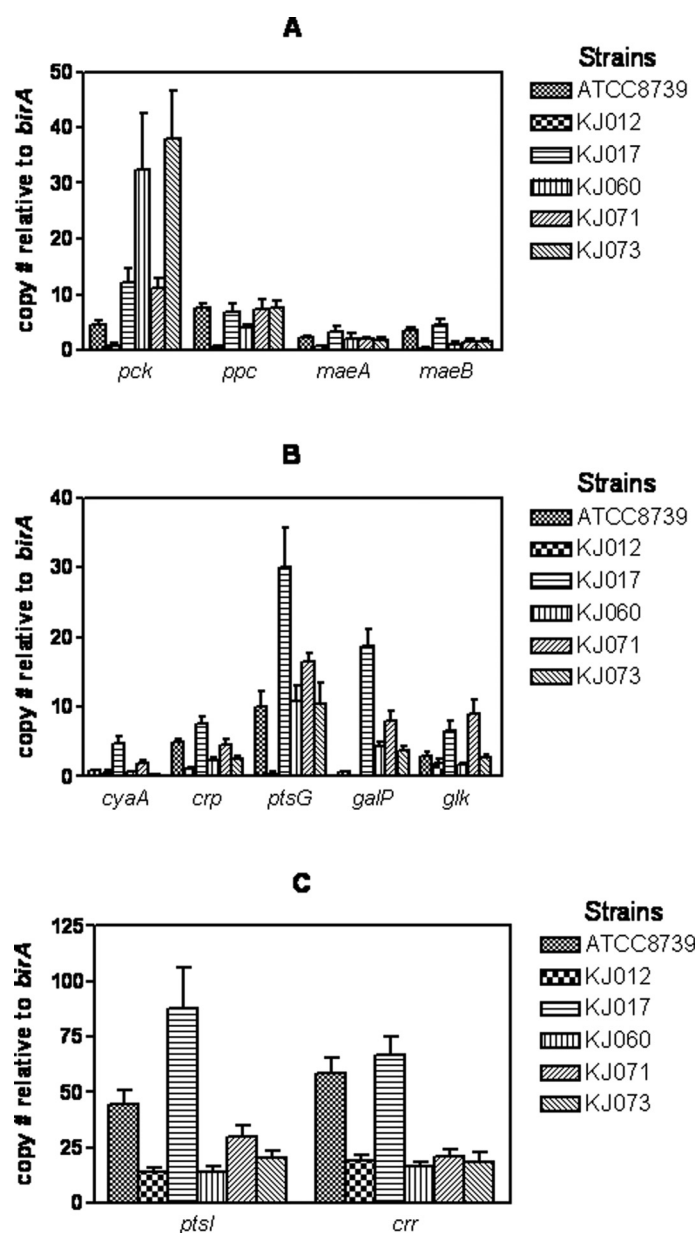

Fig. S1. Comparison of transcript abundance of the engineered succinate-producing strains. (A) carboxylation genes, including *pck*, *ppc*, *maeA* and *maeB*. (B) Glucose use genes, including *cyaA*, *crp*, *ptsG*, *galP* and *glk*; (C) *ptsI*, and *crr* gene.

**Table S1. Sources and characteristics of *E. coli* strains, plasmids, and primers used in this study**

|                                    | Relevant characteristics                                                                                                                                   | Source or reference |
|------------------------------------|------------------------------------------------------------------------------------------------------------------------------------------------------------|---------------------|
| <b>Strains</b>                     |                                                                                                                                                            |                     |
| ATCC 8739                          | Wild type                                                                                                                                                  | Lab collection      |
| KJ012                              | $\Delta ackA, \Delta ldhA, \Delta adhE$                                                                                                                    | 3                   |
| KJ017                              | $\Delta ackA, \Delta ldhA, \Delta adhE$                                                                                                                    | 3                   |
| KJ060                              | $\Delta ackA, \Delta ldhA, \Delta adhE, \Delta pflB$                                                                                                       | 3                   |
| KJ071                              | $\Delta ackA, \Delta ldhA, \Delta adhE, \Delta pflB, \Delta mgsA$                                                                                          | 3                   |
| KJ073                              | $\Delta ackA, \Delta ldhA, \Delta adhE, \Delta pflB, \Delta mgsA, \Delta poxB$                                                                             | 3                   |
| XZ320                              | KJ073, $\Delta ppc$                                                                                                                                        | This study          |
| XZ332                              | KJ073, $\Delta pck$                                                                                                                                        | This study          |
| XZ341                              | KJ073, $\Delta maeA$                                                                                                                                       | This study          |
| XZ396                              | KJ073, $\Delta maeB$                                                                                                                                       | This study          |
| XZ613                              | KJ017, $\Delta ptsI$                                                                                                                                       | This study          |
| XZ615                              | KJ060, $\Delta ptsI$                                                                                                                                       | This study          |
| XZ616                              | KJ060, restored <i>ptsI</i> to wild type                                                                                                                   | This study          |
| XZ618                              | KJ017, <i>pck</i> *                                                                                                                                        | This study          |
| XZ620                              | KJ071, <i>pck</i> *                                                                                                                                        | This study          |
| XZ622                              | KJ060, restored <i>pck</i> to wild type                                                                                                                    | This study          |
| XZ624                              | KJ073, restored <i>pck</i> to wild type                                                                                                                    | This study          |
| XZ626                              | KJ017, $\Delta cra$                                                                                                                                        | This study          |
| XZ627                              | KJ060, $\Delta cra$                                                                                                                                        | This study          |
| XZ642                              | KJ012, $\Delta crp$                                                                                                                                        | This study          |
| XZ643                              | KJ017, $\Delta crp$                                                                                                                                        | This study          |
| <b>Plasmids</b>                    |                                                                                                                                                            |                     |
| pCR2.1-TOPO                        | <i>bla kan</i> ; TOPO TA cloning vector                                                                                                                    | Invitrogen          |
| pLOI4162                           | <i>bla cat</i> ; plasmid to provide <i>cat-sacB</i> cassette                                                                                               | 19                  |
| pLOI4677                           | <i>bla kan</i> ; <i>pck</i> (including ribosomal binding site, coding and terminator fragment) from <i>E. coli</i> ATCC8739 cloned into pCR2.1-TOPO vector | This study          |
| <b><i>maeA</i> deletion</b>        |                                                                                                                                                            |                     |
| pLOI4283                           | <i>bla kan</i> ; <i>maeA</i> (PCR) from <i>E. coli</i> ATCC 8739 cloned into pCR2.1-TOPO vector                                                            | This study          |
| pLOI4284                           | <i>cat-sacB</i> cassette ( <i>SmaI-SfoI</i> fragment of pLOI4162) cloned into <i>maeA</i> of pLOI4283                                                      | This study          |
| pLOI4285                           | <i>PacI</i> digestion of pLOI4284, and self-ligated                                                                                                        | This study          |
| <b><i>ppc</i> deletion</b>         |                                                                                                                                                            |                     |
| pLOI4264                           | <i>bla kan</i> ; <i>ppc</i> (PCR) from <i>E. coli</i> ATCC 8739 cloned into pCR2.1-TOPO vector                                                             | This study          |
| pLOI4265                           | <i>cat-sacB</i> cassette ( <i>SmaI-SfoI</i> fragment of pLOI4162) cloned into <i>ppc</i> of pLOI4264                                                       | This study          |
| pLOI4266                           | <i>PacI</i> digestion of pLOI4265, and self-ligated                                                                                                        | This study          |
| <b><i>pck</i> deletion</b>         |                                                                                                                                                            |                     |
| pLOI4641                           | <i>bla kan</i> ; <i>pck</i> (PCR) from <i>E. coli</i> ATCC 8739 cloned into pCR2.1-TOPO vector                                                             | This study          |
| pLOI4642                           | <i>cat-sacB</i> cassette ( <i>SmaI-SfoI</i> fragment of pLOI4162) cloned into <i>pck</i> of pLOI4641                                                       | This study          |
| pLOI4643                           | <i>PacI</i> digestion of pLOI4642, and self-ligated                                                                                                        | This study          |
| <b><i>maeB</i> deletion</b>        |                                                                                                                                                            |                     |
| pLOI4728                           | <i>bla kan</i> ; <i>maeB</i> (PCR) from <i>E. coli</i> ATCC 8739 cloned into pCR2.1-TOPO vector                                                            | This study          |
| pLOI4729                           | <i>cat-sacB</i> cassette ( <i>SmaI-SfoI</i> fragment of pLOI4162) cloned into <i>maeB</i> of pLOI4728                                                      | This study          |
| pLOI4730                           | <i>PacI</i> digestion of pLOI4729, and self-ligated                                                                                                        | This study          |
| <b><i>ptsI</i> mutation change</b> |                                                                                                                                                            |                     |
| pLOI4734                           | <i>bla kan</i> ; <i>ptsI</i> ( <i>ptsI</i> -D-up/D-down) from <i>E. coli</i> ATCC8739 cloned into pCR2.1-TOPO vector                                       | This study          |
| pLOI4735                           | <i>cat-sacB</i> cassette ( <i>SmaI-SfoI</i> fragment of pLOI4162) cloned into <i>ptsI</i> of pLOI4734                                                      | This study          |
| <b><i>pck</i> mutation change</b>  |                                                                                                                                                            |                     |
| pLOI4736                           | <i>bla kan</i> ; <i>pck-P</i> ( <i>pck</i> -Pro-up/Pro-down) from <i>E. coli</i> ATCC873 cloned into pCR2.1-TOPO vector                                    | This study          |
| pLOI4737                           | <i>cat-sacB</i> cassette ( <i>SmaI-SfoI</i> fragment of pLOI4162) cloned into <i>pck-P</i> of pLOI4736 ( <i>pck</i> -Pro-1/Pro-2)                          | This study          |
| <b>Primers</b>                     |                                                                                                                                                            |                     |
| <b><i>pck</i> mutation change</b>  |                                                                                                                                                            |                     |
| <i>pck</i> -Pro-up                 | CACGGTAGCAACAACATTGC                                                                                                                                       | This study          |
| <i>pck</i> -Pro-down               | AGAAAGCGTCGACAACGAAC                                                                                                                                       |                     |
| <i>pck</i> -Pro-1                  | ATGCGCGTTA ACAATGGTTT                                                                                                                                      |                     |
| <i>pck</i> -Pro-2                  | ATGGATAACG TTGAACITTC                                                                                                                                      |                     |
| <b><i>ptsI</i> mutation change</b> |                                                                                                                                                            |                     |
| <i>ptsI</i> -D-up                  | CGCATTATGTTCCCGATGAT                                                                                                                                       | This study          |
| <i>ptsI</i> -D-down                | GCCTTTCAGTTCAACGGTGT                                                                                                                                       |                     |
| <i>ptsI</i> -D-1                   | CGGCCCAATTTACTGCTTAG                                                                                                                                       |                     |
| <i>ptsI</i> -D-2                   | ATCCCCAGCAACAGAAGTGT                                                                                                                                       |                     |
| <b><i>pck</i> sequencing</b>       |                                                                                                                                                            |                     |
| <i>pck</i> -F                      | TTGGCTAAGGAGCAGTGAAATGCGCGTTA                                                                                                                              | This study          |

|                         | Relevant characteristics      | Source or reference |
|-------------------------|-------------------------------|---------------------|
| pck-R                   | CACGACAAAAGAAGGGTAAATAAAC     |                     |
| pck-2                   | TTGTTAACGCGCATTTCAC           |                     |
| pck-3                   | GCGATAGCGGCTACTGTCAT          |                     |
| <i>maeA</i> deletion    |                               |                     |
| maeA-up                 | CTATGCTTGATCGGCAACCT          | This study          |
| maeA-down               | ACGATCGCCTGGTTTTAATG          |                     |
| maeA-1                  | TACCGCCGTACCTCCATCTA          |                     |
| maeA-2                  | CGTAAGGGATATAAAGCGAACG        |                     |
| <i>ppc</i> deletion     |                               |                     |
| ppc-up                  | TCAAACGATG CCCAACTGTA         | This study          |
| ppc-down                | TTTAATCCGC TTCGGAAAGA         |                     |
| ppc-1                   | GTCACTATTG CCGGGATTGC         |                     |
| ppc-2                   | CAATGCGGAA TATTGTTCTG         |                     |
| <i>pck</i> deletion     |                               |                     |
| pck-up                  | TCCGGGCAGTAGTATTTTGC          | This study          |
| pck-down                | ATGGCTGGATCAAAGTCAGC          |                     |
| pck-1                   | CCTGGCGAAACTGTTTATCG          |                     |
| pck-2                   | TTGTTAACGCGCATTTCAC           |                     |
| <i>maeB</i> deletion    |                               |                     |
| maeB-up                 | GCATCCTGGGGATGATAATG          | This study          |
| maeB-down               | TTTCTTCGCCAGTTCCTCAC          |                     |
| maeB-1                  | AACCCAACCGCTGTAATTTTT         |                     |
| maeB-2                  | CTGGAACTGGAAATTCATGG          |                     |
| Primers for sequencing* |                               |                     |
| pck-F                   | TTGGCTAAGGAGCAGTGAAATGCGCGTTA | This study          |
| pck-R                   | CACGACAAAAGAAGGGTAAATAAAC     |                     |
| pck-2                   | TTGTTAACGCGCATTTCAC           |                     |
| pck-3                   | GCGATAGCGGCTACTGTCAT          |                     |
| cra-up                  | GCGGTAAGCTTGATGCATTT          | This study          |
| cra-down                | CTTCCCCGGTTAACAGTCTCT         |                     |
| ptsHI-up1               | TCATCGGGTGAGCGTTATTT          | This study          |
| ptsHI-down1             | TGACCGTCCAGCGTAATAGC          |                     |
| ptsHI-up2               | CATCCTGGGCTGAAGATTA           |                     |
| ptsHI-down2             | AGCAATACCATACCAACGA           |                     |
| crr-up                  | CCGCGCATTAAAGAAGATTA          | This study          |
| crr-down                | CTCATCAGTGGCTTGCTGAA          |                     |
| ptsG-up                 | GAAGAACTGGCGCAGGTAAC          | This study          |
| ptsG-down               | AAGGAAAACGCCGTTAATCCT         |                     |
| cyaA-up                 | TGCCATCAACTTGTCITTTG          | This study          |
| cyaA-down               | AAAGGGCATGAGTGGATTG           |                     |
| crp-S-up                | TGAGTTGCCGTCCATTAATAA         | This study          |
| crp-S-down              | AATCGTAATTCGCCAAGCAT          |                     |
| cpdA-S-up               | GAAGTGTGTTCAAGCCAGCA          | This study          |
| cpdA-S-down             | AGGACAATGGATTCCAGCAG          |                     |
| ygiF-S-up               | ATCAGTGTGCTACGCAAAG           | This study          |
| ygiF-S-down             | GCTGTCTGCACAAAATCAC           |                     |
| sxy-S-up                | TTTACTTGCTGCGGATGAGA          | This study          |
| sxy-S-down              | TATCTCAGCCCTCGGTGCTC          |                     |
| csrA-up                 | CAGCGTTAGCCAGTGTGAAA          | This study          |
| csrA-down               | ACGCCTCTTACGAGTGCTTC          |                     |
| csrB-S-up               | CTGTAGGAGATCGCCAGGAA          |                     |
| csrB-S-down             | TCTAACAAATCGTGCAATTCG         |                     |
| csrC-S-up               | GCCATACGCTTTGTGAGACA          |                     |
| csrC-S-down             | AGTCACGCCCAATGGAATAG          |                     |
| csrD-S-up1              | ATGTGCATGATGGATTGGAA          |                     |
| csrD-S-down1            | CGGTATCCTGACCACTACGC          |                     |
| csrD-S-up2              | GTGATTTTGCTGCGCTGTTA          |                     |
| csrD-S-down2            | ACAAGGCGCAAAAATCATCT          |                     |
| uvrY-s-up1              | CCTCGTCATGTTGCAATGAA          | This study          |
| uvrY-s-down1            | TATCATCGCGTAGCAAAACG          |                     |
| barA-s-up1              | TTTTGCTTCGCTGCTGTAATA         | This study          |
| barA-s-down1            | TCAGGCACGTCGCTTTTAAT          |                     |
| barA-s-up2              | CGCGATCACCTGAATACGAT          |                     |
| barA-s-down2            | CTGGCTGGACGTTTCGATAAC         |                     |
| barA-s-up3              | TGGCCTATGTGCAACCAAAAC         |                     |

|             | Relevant characteristics | Source or reference |
|-------------|--------------------------|---------------------|
| mlc-s-up1   | CTGGCAAATAACCCGAATGT     | This study          |
| mlc-s-down1 | CCAGGGCATCTTTATTACGC     |                     |
| mlc-s-up2   | TGAAACTGAAGCCTGGCACT     |                     |

\*Primers for sequencing were used to amplify the upstream, coding, and terminator fragment of all genes.

**Table S2. Effects of mutations in *pck*, *ptsI*, and *cra* on PEP carboxykinase activity**

| Strain              | Genotype                                                                       | PEP-carboxykinase <sup>¶</sup><br>U·mg<br>protein <sup>-1</sup> |
|---------------------|--------------------------------------------------------------------------------|-----------------------------------------------------------------|
| KJ017 <sup>†</sup>  | <i>pck</i> <sup>+</sup> , <i>ptsI</i> <sup>+</sup> , <i>cra</i> <sup>+</sup>   | 0.7 ± 0.1                                                       |
| XZ618               | KJ017, <i>pck</i> <sup>*</sup>                                                 | 6.4 ± 0.2                                                       |
| XZ613               | KJ017, $\delta$ <i>ptsI</i>                                                    | 0.6 ± 0                                                         |
| XZ626               | KJ017, $\delta$ <i>cra</i>                                                     | 0.5 ± 0                                                         |
| KJ060 <sup>‡§</sup> | <i>pck</i> <sup>*</sup> , <i>ptsI</i> <sup>^</sup> , <i>cra</i> <sup>+</sup>   | 8.4 ± 0.7                                                       |
| XZ622 <sup>‡</sup>  | KJ060, - <i>pck</i> <sup>+</sup>                                               | 1.1 ± 0.1                                                       |
| XZ615               | KJ060, $\delta$ <i>ptsI</i>                                                    | 10.3 ± 1.6                                                      |
| XZ627               | KJ060, $\delta$ <i>cra</i>                                                     | 7.2 ± 0.8                                                       |
| KJ071 <sup>†§</sup> | <i>ptsI</i> <sup>^</sup> , - <i>pck</i> <sup>+</sup> , <i>cra</i> <sup>+</sup> | 0.7 ± 0.1                                                       |
| XZ620               | KJ071, <i>pck</i> <sup>*</sup>                                                 | 6.2 ± 0.4                                                       |
| KJ073 <sup>‡§</sup> | <i>pck</i> <sup>*</sup> , <i>ptsI</i> <sup>^</sup> , <i>cra</i> <sup>+</sup>   | 7.3 ± 0.5                                                       |
| XZ624 <sup>‡</sup>  | KJ073, - <i>pck</i> <sup>+</sup>                                               | 0.9 ± 0.1                                                       |

<sup>†</sup>The *pck* in KJ017 and KJ071 was mutated (G to A) to *pck*<sup>\*</sup> in XZ618 and XZ620, respectively.

<sup>‡</sup>The *pck*<sup>\*</sup> mutation in KJ060 and KJ073 was restored to wild type (A to G, - *pck*<sup>+</sup>) in XZ622 and XZ624.

<sup>§</sup>The abbreviation *ptsI*<sup>^</sup> refers to a frame-shift mutation, a single base deletion in the carboxy-terminal region.

<sup>¶</sup>Crude extract was prepared from mid-log cells during fleaker fermentation.
